# Supplementary material for: Is Diversified Crop Rotation an Effective Non-Chemical Strategy for Protecting Triticale Yield and Weed Diversity?
Source: MDPI journal article supplement (doi:10.3390/agronomy13061589), 2023-06-12
Supplement: s1 [file s1]

# Is Diversified Crop Rotation an Effective Non-chemical Strategy for Protecting Triticale Yield and Weed Diversity?

Magdalena Jastrzębska\*, Marta K. Kostrzevska and Marek Marks

Department of Agroecosystems and Horticulture, Faculty of Agriculture and Forestry, University of Warmia and Mazury in Olsztyn, Plac Łódzki 3, 10-718 Olsztyn, Poland;  
marta.kostrzevska@uwm.edu.pl (M.K.K.), marek.marks@uwm.edu.pl (M.M.)

\* Correspondence: jama@uwm.edu.pl (M.J.)

**Table S1.** Air temperature and atmospheric precipitation during the study periods according to the Meteorological Station in Bałcyny.

| Growing season                | Month |       |      |      |      |      |      |      |       |       |       |       |
|-------------------------------|-------|-------|------|------|------|------|------|------|-------|-------|-------|-------|
|                               | IX    | X     | XI   | XII  | I    | II   | III  | IV   | V     | VI    | VII   | VIII  |
| Air temperature, °C           |       |       |      |      |      |      |      |      |       |       |       |       |
| 2016/17                       | 14.7  | 6.9   | 2.5  | 1.0  | -3.2 | -1.2 | 5.1  | 6.7  | 13.1  | 16.7  | 17.3  | 18.7  |
| 2017/18                       | 13.5  | 9.4   | 4.3  | 1.9  | 0.0  | -4.1 | -0.5 | 11.9 | 16.5  | 17.9  | 20.0  | 20.4  |
| 2018/19                       | 15.3  | 9.8   | 4.1  | 1.1  | -2.5 | 2.0  | 4.9  | 8.6  | 12.2  | 21.4  | 17.6  | 19.5  |
| 2019/20                       | 13.7  | 9.9   | 5.6  | 2.8  | 2.3  | 3.1  | 3.3  | 6.9  | 10.1  | 17.9  | 17.7  | 19.2  |
| 2020/21                       | 14.7  | 10.1  | 5.6  | 1.5  | -2.5 | -4.5 | 2.4  | 5.7  | 11.6  | 19.4  | 21.1  | 16.7  |
| 1991-2020                     | 13.4  | 8.1   | 3.4  | -0.4 | -2.2 | -1.2 | 2.1  | 8.1  | 13.1  | 16.4  | 18.5  | 18.3  |
| Atmospheric precipitation, mm |       |       |      |      |      |      |      |      |       |       |       |       |
| 2016/17                       | 17.1  | 96.3  | 78.2 | 77.8 | 15.8 | 40.5 | 53.0 | 52.1 | 34.0  | 109.9 | 106.1 | 54.8  |
| 2017/18                       | 211.1 | 160.3 | 49.0 | 53.8 | 37.6 | 2.0  | 25.0 | 28.1 | 41.0  | 64.7  | 140.7 | 31.2  |
| 2018/19                       | 29.1  | 46.9  | 24.5 | 57.2 | 43.0 | 33.8 | 30.2 | 0.0  | 97.8  | 92.0  | 85.8  | 64.8  |
| 2019/20                       | 84.4  | 38.1  | 30.1 | 17.6 | 28.6 | 44.9 | 25.4 | 1.1  | 64.0  | 99.3  | 39.7  | 107.2 |
| 2020/21                       | 32.1  | 81.2  | 10.9 | 25.1 | 34.7 | 13.6 | 23.6 | 36.4 | 109.0 | 31.3  | 128.4 | 147.4 |
| 1991-2020                     | 58.0  | 56.2  | 43.4 | 43.6 | 34.2 | 26.4 | 30.9 | 29.0 | 62.4  | 72.5  | 91.9  | 66.1  |

|                    |                    |                    |
|--------------------|--------------------|--------------------|
| no PP – cultivar B | no PP – cultivar B | no PP – cultivar A |
|                    | no PP – cultivar B | no PP – cultivar A |
|                    | H – cultivar A     | H – cultivar B     |
|                    | H – cultivar B     | H – cultivar A     |
|                    | H – cultivar A     | H – cultivar B     |
|                    | H – cultivar B     | H – cultivar A     |
|                    | HF – cultivar A    | HF – cultivar B    |
|                    | HF – cultivar B    | HF – cultivar A    |
|                    | no PP – cultivar A | no PP – cultivar B |
| no PP – cultivar A |                    |                    |

no PP – plots with no plant protection treatments; H – plots with herbicide application; HF – plots with the application of herbicide and fungicide

**Figure S1.** The arrangement of plant protection levels and cultivars in a single field of crop rotation or continuous cropping in the experiment in Balcyny.

|               |                  |                  |
|---------------|------------------|------------------|
| DCR – Borowik | DCR – Borowik    | DCR – Trapero    |
|               | DCR+H – Trapero  | DCR+H – Borowik  |
|               | DCR+H – Borowik  | DCR+H – Trapero  |
|               | DCR+HF – Borowik | DCR+HF – Trapero |
|               | DCR+HF – Trapero | DCR+HF – Borowik |
|               | DCR+HF – Borowik | DCR+HF – Trapero |
|               | DCR+HF – Trapero | DCR+HF – Borowik |
|               | DCR – Trapero    | DCR – Borowik    |
|               | DCR – Trapero    |                  |

DCR – plots of diversified crop rotation with no plant protection treatments; DCR+H – plots of diversified crop rotation in which herbicide was additionally applied; DCR+HF – plots of diversified crop rotation in which herbicide and fungicide were additionally applied. Plots in grey are excluded from the study presented in the article.

**Figure S2.** The arrangement of the tested factors on winter tritcale field under the study.

**Table S2.** Hierarchical taxonomic classification of weed species observed in the experiment (according to Mirek et al. [1]) – adopted to calculate taxonomic distinctness index ( $\Delta+$ ).

| Weed species                                                  | Genus              | Family                  | Order                  | Class                | Division             | Kingdom        |
|---------------------------------------------------------------|--------------------|-------------------------|------------------------|----------------------|----------------------|----------------|
| <i>Equisetum arvense</i> L.                                   | <i>Equisetum</i>   | <i>Equisetaceae</i>     | <i>Equisetales</i>     | <i>Equisetopsida</i> | <i>Pteridophyta</i>  | <i>Plantae</i> |
| <i>Agropyron repens</i> (L.) P. Beauv.                        | <i>Agropyron</i>   | <i>Poaceae</i>          | <i>Poales</i>          | <i>Liliopsida</i>    | <i>Spermatophyta</i> | <i>Plantae</i> |
| <i>Apera spica-venti</i> (L.) P. Beauv.                       | <i>Apera</i>       | <i>Poaceae</i>          | <i>Poales</i>          | <i>Liliopsida</i>    | <i>Spermatophyta</i> | <i>Plantae</i> |
| <i>Avena fatua</i> L.                                         | <i>Avena</i>       | <i>Poaceae</i>          | <i>Poales</i>          | <i>Liliopsida</i>    | <i>Spermatophyta</i> | <i>Plantae</i> |
| <i>Poa annua</i> L.                                           | <i>Poa</i>         | <i>Poaceae</i>          | <i>Poales</i>          | <i>Liliopsida</i>    | <i>Spermatophyta</i> | <i>Plantae</i> |
| <i>Centaurea cyanus</i> L.                                    | <i>Centaurea</i>   | <i>Asteraceae</i>       | <i>Asterales</i>       | <i>Magnoliopsida</i> | <i>Spermatophyta</i> | <i>Plantae</i> |
| <i>Cirsium arvense</i> (L.) Scop.                             | <i>Cirsium</i>     | <i>Asteraceae</i>       | <i>Asterales</i>       | <i>Magnoliopsida</i> | <i>Spermatophyta</i> | <i>Plantae</i> |
| <i>Chamomilla suaveolens</i> (Pursh) Rydb.                    | <i>Chamomilla</i>  | <i>Asteraceae</i>       | <i>Asterales</i>       | <i>Magnoliopsida</i> | <i>Spermatophyta</i> | <i>Plantae</i> |
| <i>Matricaria maritima</i> ssp. <i>inodora</i> (L.) Dostál    | <i>Matricaria</i>  | <i>Asteraceae</i>       | <i>Asterales</i>       | <i>Magnoliopsida</i> | <i>Spermatophyta</i> | <i>Plantae</i> |
| <i>Sonchus arvensis</i> L.                                    | <i>Sonchus</i>     | <i>Asteraceae</i>       | <i>Asterales</i>       | <i>Magnoliopsida</i> | <i>Spermatophyta</i> | <i>Plantae</i> |
| <i>Anchusa arvensis</i> (L.) M. Bieb.                         | <i>Anchusa</i>     | <i>Boraginaceae</i>     | <i>Boraginales</i>     | <i>Magnoliopsida</i> | <i>Spermatophyta</i> | <i>Plantae</i> |
| <i>Myosotis arvensis</i> (L.) Hill                            | <i>Myosotis</i>    | <i>Boraginaceae</i>     | <i>Boraginales</i>     | <i>Magnoliopsida</i> | <i>Spermatophyta</i> | <i>Plantae</i> |
| <i>Capsella bursa-pastoris</i> (L.) Medik.                    | <i>Capsella</i>    | <i>Brassicaceae</i>     | <i>Capparales</i>      | <i>Magnoliopsida</i> | <i>Spermatophyta</i> | <i>Plantae</i> |
| <i>Thlaspi arvense</i> L.                                     | <i>Thlaspi</i>     | <i>Brassicaceae</i>     | <i>Capparales</i>      | <i>Magnoliopsida</i> | <i>Spermatophyta</i> | <i>Plantae</i> |
| <i>Atriplex patula</i> L.                                     | <i>Atriplex</i>    | <i>Amaranthaceae</i>    | <i>Caryophyllales</i>  | <i>Magnoliopsida</i> | <i>Spermatophyta</i> | <i>Plantae</i> |
| <i>Arenaria serpyllifolia</i> L.                              | <i>Arenaria</i>    | <i>Caryophyllaceae</i>  | <i>Caryophyllales</i>  | <i>Magnoliopsida</i> | <i>Spermatophyta</i> | <i>Plantae</i> |
| <i>Stellaria media</i> (L.) Vill.                             | <i>Stellaria</i>   | <i>Caryophyllaceae</i>  | <i>Caryophyllales</i>  | <i>Magnoliopsida</i> | <i>Spermatophyta</i> | <i>Plantae</i> |
| <i>Chenopodium album</i> L.                                   | <i>Chenopodium</i> | <i>Chenopodiaceae</i>   | <i>Caryophyllales</i>  | <i>Magnoliopsida</i> | <i>Spermatophyta</i> | <i>Plantae</i> |
| <i>Vicia hirsuta</i> (L.) Gray                                | <i>Vicia</i>       | <i>Fabaceae</i>         | <i>Fabales</i>         | <i>Magnoliopsida</i> | <i>Spermatophyta</i> | <i>Plantae</i> |
| <i>Galium aparine</i> L.                                      | <i>Galium</i>      | <i>Rubiaceae</i>        | <i>Gentianales</i>     | <i>Magnoliopsida</i> | <i>Spermatophyta</i> | <i>Plantae</i> |
| <i>Erodium cicutarium</i> (L.) L'Hér.                         | <i>Erodium</i>     | <i>Geraniaceae</i>      | <i>Geraniales</i>      | <i>Magnoliopsida</i> | <i>Spermatophyta</i> | <i>Plantae</i> |
| <i>Geranium pusillum</i> Burm. F. ex L.                       | <i>Geranium</i>    | <i>Geraniaceae</i>      | <i>Geraniales</i>      | <i>Magnoliopsida</i> | <i>Spermatophyta</i> | <i>Plantae</i> |
| <i>Galeopsis tetrahit</i> L.                                  | <i>Galeopsis</i>   | <i>Lamiaceae</i>        | <i>Lamiales</i>        | <i>Magnoliopsida</i> | <i>Spermatophyta</i> | <i>Plantae</i> |
| <i>Lamium amplexicaule</i> L.                                 | <i>Lamium</i>      | <i>Lamiaceae</i>        | <i>Lamiales</i>        | <i>Magnoliopsida</i> | <i>Spermatophyta</i> | <i>Plantae</i> |
| <i>Mentha arvensis</i> L.                                     | <i>Mentha</i>      | <i>Lamiaceae</i>        | <i>Lamiales</i>        | <i>Magnoliopsida</i> | <i>Spermatophyta</i> | <i>Plantae</i> |
| <i>Fumaria officinalis</i> L.                                 | <i>Fumaria</i>     | <i>Fumariaceae</i>      | <i>Papaverales</i>     | <i>Magnoliopsida</i> | <i>Spermatophyta</i> | <i>Plantae</i> |
| <i>Fallopia convolvulus</i> (L.) Á. Löve                      | <i>Fallopia</i>    | <i>Polygonaceae</i>     | <i>Polygonales</i>     | <i>Magnoliopsida</i> | <i>Spermatophyta</i> | <i>Plantae</i> |
| <i>Polygonum aviculare</i> L.                                 | <i>Polygonum</i>   | <i>Polygonaceae</i>     | <i>Polygonales</i>     | <i>Magnoliopsida</i> | <i>Spermatophyta</i> | <i>Plantae</i> |
| <i>Polygonum laphathifolium</i> L. ssp. <i>laphathifolium</i> | <i>Polygonum</i>   | <i>Polygonaceae</i>     | <i>Polygonales</i>     | <i>Magnoliopsida</i> | <i>Spermatophyta</i> | <i>Plantae</i> |
| <i>Veronica arvensis</i> L.                                   | <i>Veronica</i>    | <i>Scrophulariaceae</i> | <i>Scrophulariales</i> | <i>Magnoliopsida</i> | <i>Spermatophyta</i> | <i>Plantae</i> |
| <i>Veronica persica</i> Poir.                                 | <i>Veronica</i>    | <i>Scrophulariaceae</i> | <i>Scrophulariales</i> | <i>Magnoliopsida</i> | <i>Spermatophyta</i> | <i>Plantae</i> |
| <i>Viola arvensis</i> Murray                                  | <i>Viola</i>       | <i>Violaceae</i>        | <i>Violales</i>        | <i>Magnoliopsida</i> | <i>Spermatophyta</i> | <i>Plantae</i> |

**Table S3.** Weed functional traits used to calculate functional diversity index (Q).

| Plant trait                             | Trait characteristics                                                                      | Rationale                                                   | Data source           |
|-----------------------------------------|--------------------------------------------------------------------------------------------|-------------------------------------------------------------|-----------------------|
| Maximum plant height                    | Quantitative, m                                                                            | light and water acquisition, competition ability            | [2,3]                 |
| Growth habit                            | Qualitative: erect, prostrate, climbing                                                    | resource acquisition, space use, competition ability        | [2], own observations |
| Specific leaf area (SLA)                | Quantitative, mm <sup>2</sup> /mg                                                          | resource acquisition, stress tolerance, competition ability | [2] <sup>1</sup>      |
| Season of emergence                     | Qualitative: spring, autumn or spring                                                      | competition start time                                      | [3], own observations |
| Seed number                             | Quantitative, No./shoot: no seeds, <100; 100–1,000; 1,000–10,000; 10,000–100,000; >100,000 | propagation, colonization capacity, future weed density     | [2], own observations |
| Ecological trophic indicator value (Tr) | Quantitative, 1-5 scale <sup>2</sup>                                                       | trophic requirements, competition ability                   | [4,5] <sup>3</sup>    |

<sup>1</sup> average from available data; <sup>2</sup> 1 – soil extremely oligotrophic, 5 – soil extremely fertile; <sup>3</sup> [5] was used only for *Chamomilla suaveolens* (Pursh) Rydb. = *Matricaria discoidea* DC. (N value was used after scale converting).

**Table S4.** Weed species and their functional trait values adopted to calculate functional diversity index (Q) in the experiment.

| Weed species                                                  | Height, m      | Growth habit | SLA, mm <sup>2</sup> mg <sup>-1</sup> | Season of emergence | Seed No. shoot <sup>1</sup> | Tr value         |
|---------------------------------------------------------------|----------------|--------------|---------------------------------------|---------------------|-----------------------------|------------------|
| <i>Equisetum arvense</i> L.                                   | 0.5            | erect        | 10.4                                  | spring              | <i>no seeds</i>             | 3.5              |
| <i>Agropyron repens</i> (L.) P. Beauv.                        | 1.5            | erect        | 23.8                                  | spring              | 100 - 1000                  | 3.5              |
| <i>Apera spica-venti</i> (L.) P. Beauv.                       | 1.5            | erect        | 19.1                                  | autumn or spring    | 1000 - 10,000               | 3                |
| <i>Avena fatua</i> L.                                         | 1.3            | erect        | 21.8                                  | spring              | 100 - 1000                  | 3                |
| <i>Poa annua</i> L.                                           | 0.3            | erect        | 36.4                                  | autumn or spring    | 100 - 1000                  | 4                |
| <i>Centaurea cyanus</i> L.                                    | 1              | erect        | 26.0                                  | autumn or spring    | 1000 - 10,000               | 3                |
| <i>Cirsium arvense</i> (L.) Scop.                             | 1.5            | erect        | 15.4                                  | spring              | 1000 - 10,000               | 3.5              |
| <i>Chamomilla suaveolens</i> (Pursh) Rydb.                    | 0.5            | erect        | 23.3                                  | spring              | 1000 - 10,000               | 4.5 <sup>1</sup> |
| <i>Matricaria maritima</i> ssp. <i>inodora</i> (L.) Dostál    | 1              | erect        | 19.7                                  | autumn or spring    | 10,000 - 100,000            | 4                |
| <i>Sonchus arvensis</i> L.                                    | 1.5            | erect        | 21.7                                  | spring              | 10,000 - 100,000            | 3.5              |
| <i>Anchusa arvensis</i> (L.) M. Bieb.                         | 1              | erect        | 16.5                                  | spring              | 100 - 1000                  | 3                |
| <i>Myosotis arvensis</i> (L.) Hill                            | 0.5            | erect        | 29.4                                  | autumn or spring    | 100 - 1000                  | 3.5              |
| <i>Capsella bursa-pastoris</i> (L.) Medik.                    | 0.7            | erect        | 30.0                                  | autumn or spring    | 1000 - 10,000               | 4                |
| <i>Thlaspi arvense</i> L.                                     | 0.5            | erect        | 24.6                                  | autumn or spring    | 1000 - 10,000               | 4                |
| <i>Atriplex patula</i> L.                                     | 1.5            | erect        | 17.4                                  | spring              | 100 - 1000                  | 4                |
| <i>Arenaria serpyllifolia</i> L.                              | 0.3            | prostrate    | 20.1                                  | autumn or spring    | 100 - 1000                  | 2                |
| <i>Stellaria media</i> (L.) Vill.                             | 0.6            | prostrate    | 53.7                                  | autumn or spring    | 10,000 - 100,000            | 4.5              |
| <i>Chenopodium album</i> L.                                   | 1.4            | erect        | 22.2                                  | spring              | 10,000 - 100,000            | 4.5              |
| <i>Vicia hirsuta</i> (L.) Gray                                | 0.6            | climbing     | 22.1                                  | autumn or spring    | 100 - 1000                  | 3.5              |
| <i>Galium aparine</i> L.                                      | 2 <sup>2</sup> | climbing     | 34.7                                  | autumn or spring    | 100 - 1000                  | 4.5              |
| <i>Erodium cicutarium</i> (L.) L'Hér.                         | 0.6            | erect        | 25.7                                  | autumn or spring    | 100 - 1000                  | 3                |
| <i>Geranium pusillum</i> Burm. F. ex L.                       | 0.5            | prostrate    | 25.5                                  | autumn or spring    | 100 - 1000                  | 4                |
| <i>Galeopsis tetrahit</i> L.                                  | 1              | erect        | 31.0                                  | spring              | 100 - 1000                  | 3.5              |
| <i>Lamium amplexicaule</i> L.                                 | 0.3            | erect        | 19.7                                  | autumn or spring    | 100 - 1000                  | 3.5              |
| <i>Mentha arvensis</i> L.                                     | 0.6            | erect        | 41.4                                  | spring              | 100 - 1000                  | 3.5              |
| <i>Fumaria officinalis</i> L.                                 | 0.5            | erect        | 28.5                                  | spring              | 100 - 1000                  | 4                |
| <i>Fallopia convolvulus</i> (L.) Á. Löve                      | 2              | climbing     | 23.9                                  | spring              | 100 - 1000                  | 3.5              |
| <i>Polygonum aviculare</i> L.                                 | 0.6            | prostrate    | 28.9                                  | spring              | 100 - 1000                  | 3.5              |
| <i>Polygonum laphathifolium</i> L. ssp. <i>laphathifolium</i> | 1              | erect        | 22.7                                  | spring              | 100 - 1000                  | 4.5              |
| <i>Veronica arvensis</i> L.                                   | 0.5            | erect        | 25.4                                  | autumn or spring    | 100 - 1000                  | 3.5              |
| <i>Veronica persica</i> Poir.                                 | 0.5            | prostrate    | 39.6                                  | autumn or spring    | 100 - 1000                  | 4.5              |
| <i>Viola arvensis</i> Murray                                  | 0.5            | erect        | 24.3                                  | autumn or spring    | 100 - 1000                  | 3.5              |

<sup>1</sup>N value by Ellenberg [5] was used after scale converting; <sup>2</sup> stem length was shown.

**Table S5.** Average proportion (%) of weed species biomass in the experiment.

| Weed species                                                  | CR      |      |      |      |      |         |      |      |      |      | CR+H    |      |      |      |      |         |      |      |      |      |
|---------------------------------------------------------------|---------|------|------|------|------|---------|------|------|------|------|---------|------|------|------|------|---------|------|------|------|------|
|                                                               | Trapero |      |      |      |      | Borowik |      |      |      |      | Trapero |      |      |      |      | Borowik |      |      |      |      |
|                                                               | 2017    | 2018 | 2019 | 2020 | 2021 | 2017    | 2018 | 2019 | 2020 | 2021 | 2017    | 2018 | 2019 | 2020 | 2021 | 2017    | 2018 | 2019 | 2020 | 2021 |
| <i>Equisetum arvense</i> L.                                   | 9.4     | 6.8  | 5.8  | 0.5  | 3.2  | 81.9    | -    | -    | -    | 2.7  | -       | -    | -    | -    | 7.8  | -       | -    | 23.6 | -    | 90.9 |
| <i>Agropyron repens</i> (L.) P. Beauv.                        | 6.2     | 0.2  | -    | -    | -    | 0.6     | -    | -    | -    | -    | 85.4    | -    | 28.0 | 50.0 | -    | 56.8    | -    | -    | -    | 5.4  |
| <i>Apera spica-venti</i> (L.) P. Beauv.                       | 5.1     | 44.8 | 69.4 | 46.7 | 27.0 | -       | 27.6 | 46.2 | 4.0  | -    | -       | -    | 15.3 | -    | -    | 3.3     | 17.1 | -    | -    | -    |
| <i>Avena fatua</i> L.                                         | 9.1     | -    | -    | -    | -    | -       | -    | -    | -    | 0.4  | 0.0     | -    | -    | -    | -    | 2.7     | -    | -    | -    | -    |
| <i>Poa annua</i> L.                                           | -       | -    | -    | 0.0  | 0.1  | -       | 0.0  | -    | 1.6  | 0.3  | -       | -    | -    | 13.6 | -    | -       | -    | -    | -    | -    |
| <i>Centaurea cyanus</i> L.                                    | -       | 20.8 | -    | -    | 9.8  | -       | 51.4 | -    | 27.2 | -    | -       | -    | -    | -    | 64.7 | 29.5    | 82.9 | 72.4 | -    | -    |
| <i>Cirsium arvense</i> (L.) Scop.                             | -       | 1.1  | -    | -    | -    | -       | -    | -    | -    | -    | -       | -    | 13.6 | -    | 10.9 | -       | -    | -    | -    | -    |
| <i>Chamomilla suaveolens</i> (Pursh) Rydb.                    | -       | 3.1  | -    | 0.5  | 0.9  | 0.2     | -    | -    | 0.7  | 3.7  | -       | -    | -    | -    | -    | -       | -    | -    | -    | 0.4  |
| <i>Matricaria maritima</i> ssp. <i>inodora</i> (L.) Dostál    | -       | 22.8 | -    | 11.1 | 43.4 | -       | 21.0 | 7.4  | -    | 21.7 | -       | -    | -    | -    | -    | -       | -    | -    | -    | -    |
| <i>Sonchus arvensis</i> L.                                    | -       | -    | 7.4  | -    | -    | -       | -    | -    | 0.1  | -    | 7.7     | -    | -    | -    | -    | 0.8     | -    | -    | -    | -    |
| <i>Anchusa arvensis</i> (L.) M. Bieb.                         | -       | -    | -    | 3.5  | 0.4  | -       | -    | -    | 2.4  | -    | -       | -    | -    | -    | -    | -       | -    | -    | -    | -    |
| <i>Myosotis arvensis</i> (L.) Hill                            | -       | -    | -    | 1.5  | 0.7  | 3.4     | -    | 8.5  | -    | -    | -       | -    | -    | -    | -    | -       | -    | -    | -    | -    |
| <i>Capsella bursa-pastoris</i> (L.) Medik.                    | 4.5     | 0.0  | 0.7  | 7.7  | 5.3  | 3.9     | -    | 2.9  | 4.0  | 3.7  | -       | -    | -    | -    | -    | -       | -    | -    | -    | -    |
| <i>Thlaspi arvense</i> L.                                     | 0.6     | -    | -    | 1.9  | 0.7  | 2.8     | -    | -    | 1.9  | 0.2  | -       | -    | -    | -    | -    | -       | -    | -    | -    | -    |
| <i>Atriplex patula</i> L.                                     | -       | -    | 1.6  | -    | -    | -       | -    | -    | -    | -    | -       | -    | -    | -    | -    | -       | -    | -    | -    | -    |
| <i>Arenaria serpyllifolia</i> L.                              | -       | -    | 0.1  | 3.4  | 0.2  | -       | -    | 1.3  | 0.3  | -    | -       | -    | -    | -    | -    | -       | -    | -    | -    | -    |
| <i>Stellaria media</i> (L.) Vill.                             | -       | 0.2  | 3.5  | 3.5  | 3.1  | -       | -    | 29.1 | 7.6  | 40.4 | -       | -    | -    | -    | -    | -       | -    | -    | -    | -    |
| <i>Chenopodium album</i> L.                                   | -       | 0.1  | -    | -    | -    | -       | -    | -    | 0.1  | -    | -       | -    | -    | -    | -    | -       | -    | -    | -    | 0.2  |
| <i>Vicia hirsuta</i> (L.) Gray                                | -       | -    | 2.1  | 13.6 | -    | -       | -    | 1.5  | 40.6 | -    | -       | -    | -    | -    | -    | -       | -    | -    | -    | -    |
| <i>Galium aparine</i> L.                                      | 60.1    | -    | 2.3  | -    | 0.3  | -       | 0.0  | -    | -    | 4.1  | 6.8     | -    | 38.1 | -    | -    | 6.9     | -    | 3.2  | -    | -    |
| <i>Erodium cicutarium</i> (L.) L'Hér.                         | -       | -    | -    | -    | -    | -       | -    | -    | -    | 7.9  | -       | -    | -    | -    | -    | -       | -    | -    | -    | -    |
| <i>Geranium pusillum</i> Burm. F. ex L.                       | -       | -    | -    | -    | 1.1  | -       | -    | 1.0  | -    | 0.6  | -       | -    | -    | -    | -    | -       | -    | -    | -    | -    |
| <i>Galeopsis tetrahit</i> L.                                  | -       | -    | -    | 0.1  | 0.0  | -       | -    | -    | 0.8  | -    | -       | 22.2 | -    | 18.2 | 6.5  | -       | -    | -    | 75.0 | 1.6  |
| <i>Lamium amplexicaule</i> L.                                 | 0.5     | -    | -    | 0.2  | 0.1  | 4.8     | -    | -    | 0.1  | 1.9  | -       | -    | -    | -    | -    | -       | -    | -    | -    | -    |
| <i>Mentha arvensis</i> L.                                     | -       | -    | -    | -    | -    | 0.9     | -    | -    | -    | -    | -       | -    | -    | -    | -    | -       | -    | -    | -    | -    |
| <i>Fumaria officinalis</i> L.                                 | 0.8     | -    | 1.8  | -    | 0.4  | -       | -    | -    | -    | 0.7  | -       | -    | -    | -    | 7.1  | -       | -    | -    | -    | -    |
| <i>Fallopia convolvulus</i> (L.) Á. Löve                      | 1.4     | -    | 0.1  | 0.2  | -    | -       | -    | -    | 1.1  | -    | 0.0     | -    | 5.1  | 18.2 | 2.2  | -       | -    | 0.8  | 25.0 | 1.4  |
| <i>Polygonum aviculare</i> L.                                 | -       | 0.0  | -    | -    | 0.0  | 0.5     | -    | -    | -    | 0.0  | -       | 77.8 | -    | -    | -    | -       | -    | -    | -    | -    |
| <i>Polygonum laphathifolium</i> L. ssp. <i>laphathifolium</i> | -       | -    | -    | 0.0  | -    | -       | -    | -    | 0.1  | -    | -       | -    | -    | -    | 0.7  | -       | -    | -    | -    | -    |
| <i>Veronica arvensis</i> L.                                   | -       | -    | -    | 0.5  | 0.9  | -       | -    | 1.3  | 3.7  | 0.1  | -       | -    | -    | -    | -    | -       | -    | -    | -    | -    |
| <i>Veronica persica</i> Poir.                                 | -       | -    | 0.1  | 2.1  | 1.6  | -       | -    | -    | 1.0  | 11.2 | -       | -    | -    | -    | -    | -       | -    | -    | -    | -    |
| <i>Viola arvensis</i> Murray                                  | 2.2     | -    | 5.1  | 2.9  | 0.8  | 0.9     | -    | 0.9  | 2.6  | 0.3  | -       | -    | -    | -    | -    | -       | -    | -    | -    | -    |
| Total                                                         | 100     | 100  | 100  | 100  | 100  | 100     | 100  | 100  | 100  | 100  | 100     | 100  | 100  | 100  | 100  | 100     | 100  | 100  | 100  | 100  |

## Formulas for diversity indices and their explanations

- Renyi diversity profiles ( $H_\alpha$ ) [6]:

$$H_\alpha = \left( \ln \sum_{i=1}^S p_i^\alpha \right) (1-\alpha)^{-1} \quad (1)$$

where:

$p_i$  – proportion of  $i$ -species biomass to the community biomass;  $\ln$  – natural logarithm;  $S$  – species richness;  $\alpha$  – diversity levels assuming that  $\alpha \geq 0$ ,  $\alpha \neq 1$ .

For  $\alpha = 1$  Shannon-Wiener index ( $H'$ ) [7]:

$$H' = - \sum_{i=1}^S (p_i \ln p_i) \quad (2)$$

- Taxonomic distinctness indices ( $\Delta^+$ ) [8]:

$$\Delta^+ = \frac{\sum \sum_{i < j} w_{ij} x_i x_j}{\sum \sum_{i < j} x_i x_j} \quad (3)$$

where:

$w_{ij}$  – the ‘distinctness weight’ of the  $i$ -th and  $j$ -th species according to the hierarchical taxonomic classification:  $w = 0$  for biomass of individuals within the same species;  $w = 1$  for different species within the same genus;  $w = 2$  for species within the same family but different genera;  $w = 3$  for species within the same order but different family;  $w = 4$  for species within the same class but in different order;  $w = 5$  for species within the same division but different class;  $w = 6$  for species in different divisions of the plant kingdom; the basic taxonomic categories in the plant kingdom as well as systematic positions of individual species followed Mirek et al. [1] (see also Table S2);  $x_i$  – biomass of the  $i$ -th species in the community;  $x_j$  – biomass of the  $j$ -th species in the community.

- Rao’s quadratic entropy ( $Q$ ) [9]:

$$Q = \sum_{i=1}^{S-1} \sum_{j=i+1}^S d_{ij} p_i p_j \quad (4)$$

where:

$p_i$  – proportion of  $i$ -species biomass to the community biomass;  $p_j$  – proportion of  $j$ -species biomass to the community biomass;  $d_{ij}$  – dissimilarity between species  $i$  and  $j$ , measured by the Euclidean distance based on six arbitrarily chosen functional traits: maximum plant height, growth habit, specific leaf area (SLA), season of emergence, seed number, and ecological trophic indicator value (Tr) (see also Table S3 for trait characteristics and rationale, and Table S4 for the list of weed species and their functional trait values adopted to calculate functional diversity index).

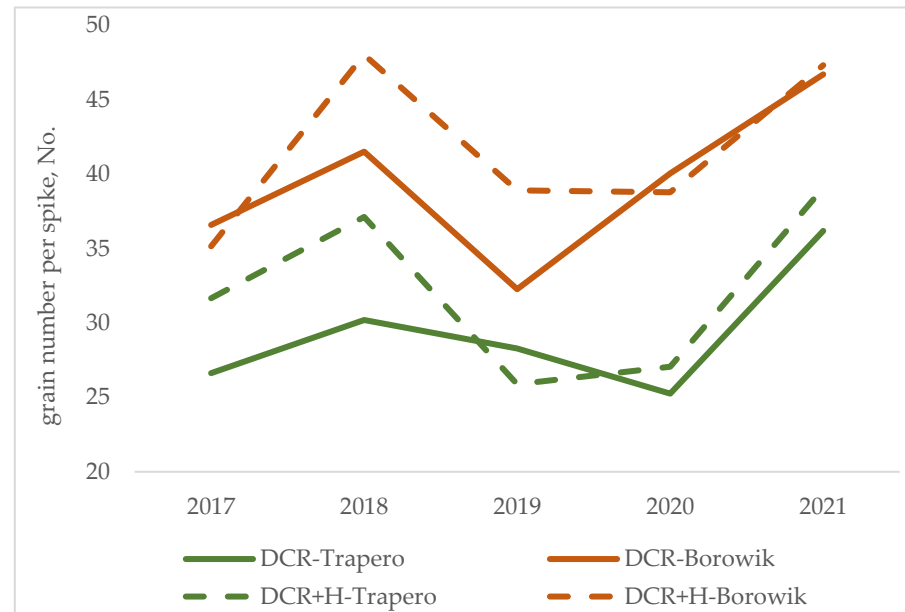

(a)

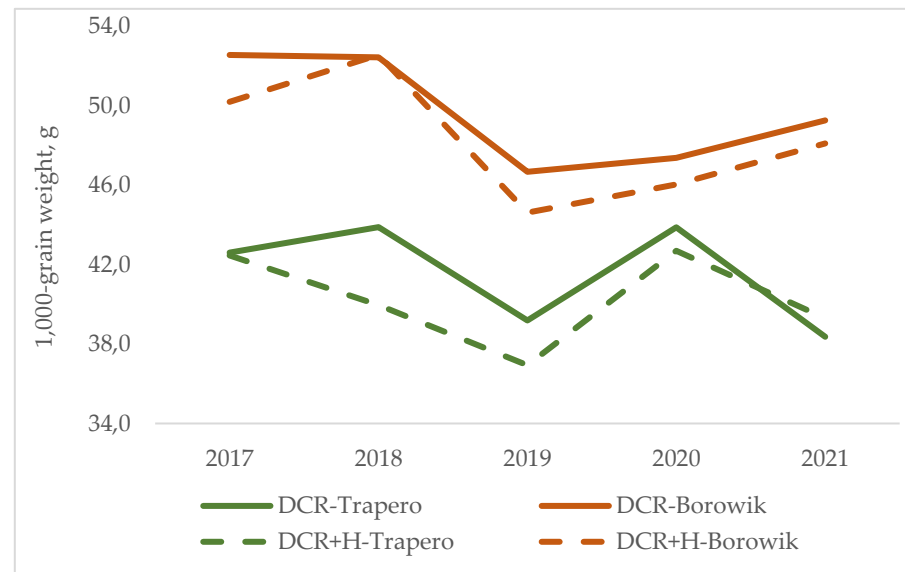

(b)

**Figure S3.** Effects of the interaction of weed management strategy × cultivar × year on grain number per spike (a) and 1,000-grain weight (b) of winter triticale.



## References:

1. Mirek, Z.; Piekos-Mirkowa, H.; Zajac, A.; Zajac, M. *Flowering plants and pteridophytes of Poland. A checklist*; W. Szafer Institute of Botany, PAN: Kraków, Poland, 2002.
2. Kleyer, M.; Bekker, R.M.; Knevel, I.C.; Bakker, J.P.; Thompson, K.; Sonnenschein, M.; Poschlod, P.; Van Groenendael, J.M.; Klimeš, L.; Klimešová, J.; et al. The LEDA Traitbase: A database of life-history traits of the Northwest European flora. *J. Ecol.* **2008**, *96*, 1266-1274, doi:10.1111/j.1365-2745.2008.01430.x.
3. Paradowski, A. *Atlas chwastów*; Plantpress: Kraków, Poland, 2013.
4. Zarzycki, K.; Trzcińska-Tacik, H.; Różański, W.; Szelać, Z.; Wołek, J.; Korzeniak, U. *Ecological indicator values of vascular plants of Poland*; W.Szafer Institute of Botany, Polish Academy of Sciences: Kraków; Poland, 2002; Volume 2, p. 183.
5. Ellenberg, H. Indicator values of vascular plants in central Europe. *Scripta Geobot.* **1974**, *9*, 1-97.
6. Tóthmérész, B. On the characterization of scale-dependent diversity. *Abstracta Bot.* **1998**, *22*, 149-156.
7. Spellerberg, I.F.; Fedor, P.J. A tribute to Claude Shannon (1916–2001) and a plea for more rigorous use of species richness, species diversity and the ‘Shannon–Wiener’ Index. *Glob. Ecol. Biogeogr.* **2003**, *12*, 177-179.
8. Warwick, R.M. Average Taxonomic Diversity and Distinctness. In *Encyclopedia of Ecology, Five-Volume Set*; Elsevier Inc.: Amsterdam, The Netherlands, 2008; pp. 300-305.
9. Rao, C.R. Diversity and dissimilarity coefficients: A unified approach. *Theor. Popul. Biol.* **1982**, *21*, 24-43, doi:10.1016/0040-5809(82)90004-1.
